# Supplementary material for: AQP3-Dependent PI3K/Akt Modulation in Breast Cancer Cells
Source: MDPI journal article supplement (doi:10.3390/ijms24098133), 2023-05-01
Supplement: s1 [file s1]

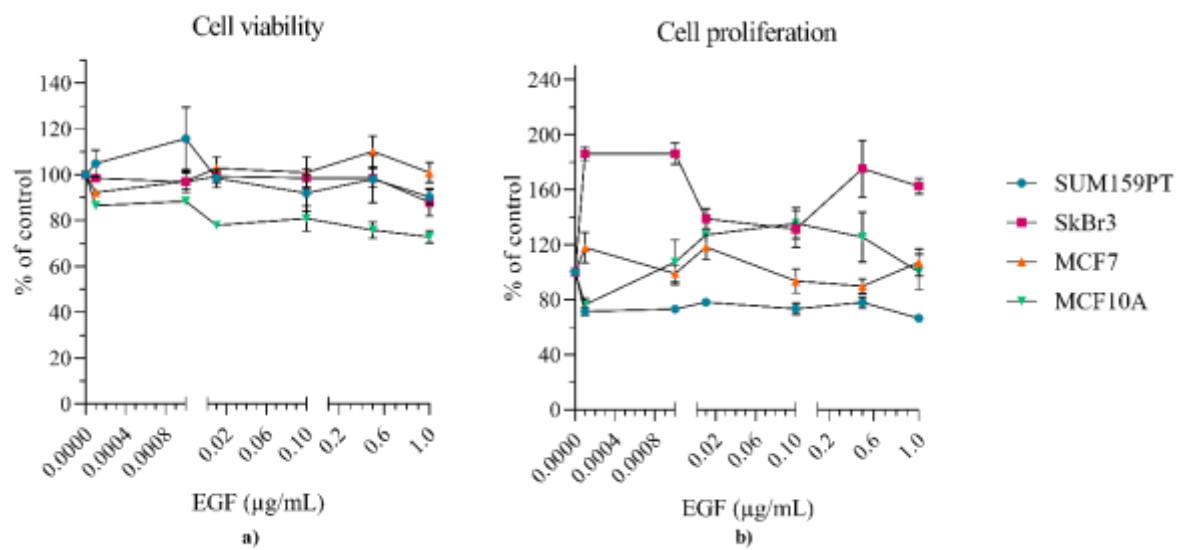

**Figure S1.** Cell viability (a) and proliferation (b) measurements after treatment with different concentrations of EGF.

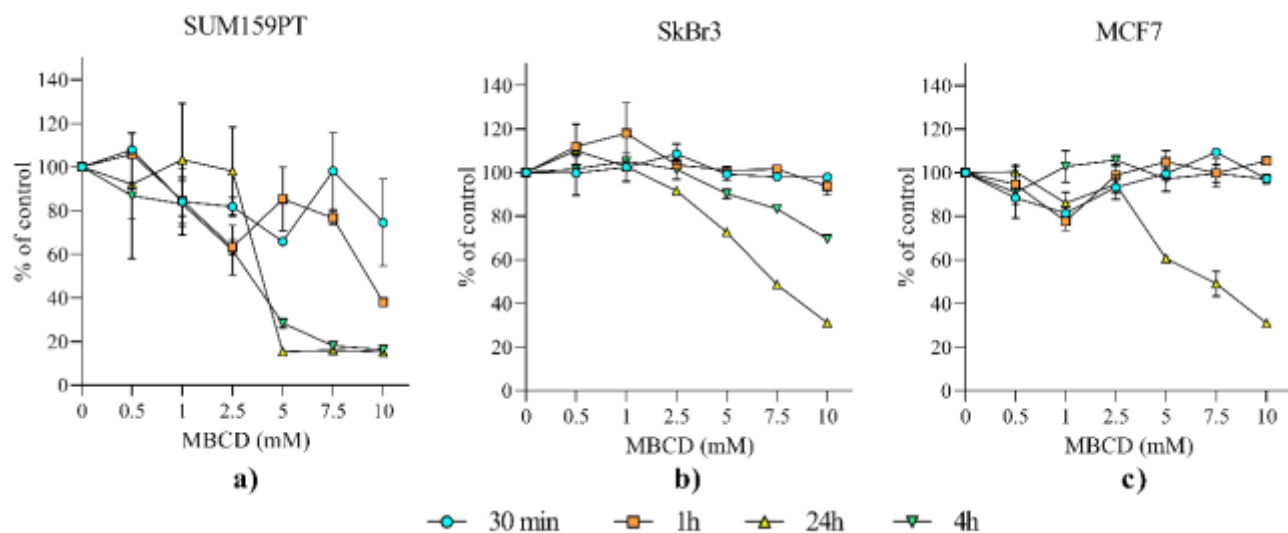

**Figure S2.** Cell viability measurements on SUM159PT (a), SkBr-3 (b), and MCF7 (c) after treatment with different concentrations of MBCD in different time periods.

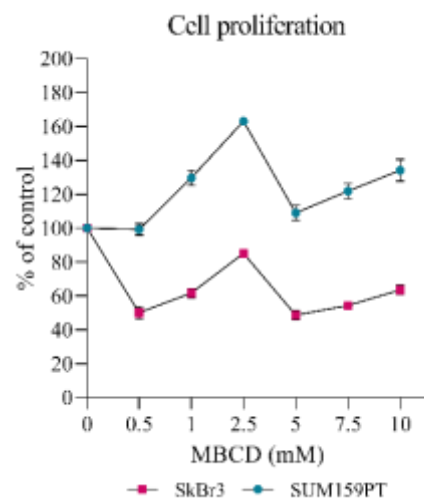

**Figure S3.** Cell proliferation measurements after treatment with different concentrations of MBGD.

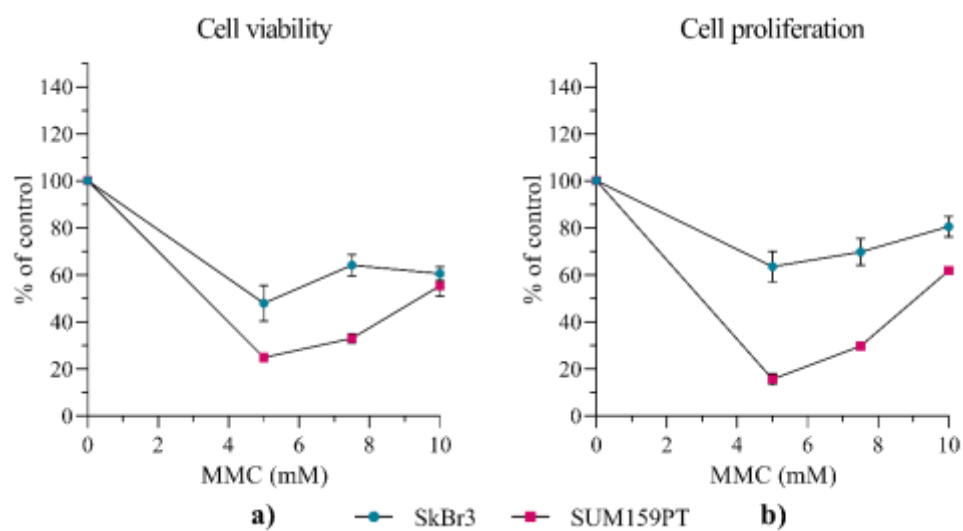

**Figure S4.** Cell viability (a) and proliferation (b) measurements after treatment with different concentrations of MMC.
